# Supplementary material
Source: publisher figshare collection journal article supplement (https://acs.figshare.com/ndownloader/files/3854062)
Supplement: Supplementary file 1 [file 3854062]

**New Insight into Structural Evolution in Layered NaCrO<sub>2</sub> during  
Electrochemical Sodium Extraction**

Kei Kubota,<sup>a,b</sup> Issei Ikeuchi,<sup>a</sup> Tetsuri Nakayama,<sup>a</sup> Chikara Takei,<sup>a</sup>  
Naoaki Yabuuchi,<sup>a,b</sup> Hiromasa Shiiba,<sup>c</sup> Masanobu Nakayama<sup>b,c</sup> and Shinichi  
Komaba<sup>a,b,z\*</sup>

<sup>a</sup>*Department of Applied Chemistry, Tokyo University of Science, 1-3 Kagurazaka,  
Shinjuku, Tokyo 162-8601, Japan*

<sup>b</sup>*Elements Strategy Initiative for Catalysts and Batteries, Kyoto University, 1-30 Goryo-  
Ohara, Nishikyo-ku, Kyoto 615-8245, Japan*

<sup>c</sup>*Department of Materials Science and Engineering, Nagoya Institute of Technology,  
Gokiso, Showa-ku, Nagoya, Aichi 466-8555, Japan*

## Supporting Information

Table S1 Structural parameters of NaCrO<sub>2</sub> obtained from EAXFS measurements at Mn and Ni *K*-edges: interatomic distance (*R*), and Debye-Waller factor ( $\sigma^2$ ), and phase correction ( $\Delta E$ ) were refined. Coordination number (CN) was fixed based on the structural model.

| Sample            | Shell Number | X-Y Pair | CN | <i>R</i> / Å | $\sigma^2$ / Å <sup>2</sup> | $\Delta E$ / eV | <i>k</i> -range | R-factor / % |
|-------------------|--------------|----------|----|--------------|-----------------------------|-----------------|-----------------|--------------|
| pristine          | Cr 1         | Cr-O     | 6  | 2.008(9)     | 0.0018 (12)                 | 2.0(15)         | 2.65-12.15      | 2.3          |
|                   | Cr 2         | Cr-Cr    | 6  | 2.986(8)     | 0.0016(13)                  |                 |                 |              |
| 3.6 V             | Cr 1         | Cr-O     | 4  | 1.92 (7)     | 0.002(9)                    | -0.3(111)       | 2.7-13.0        | 0.082        |
|                   | Cr 2         | Cr-O     | 2  | 2.03(7)      | 0.0007(116)                 |                 |                 |              |
|                   | Cr3          | Cr-Na    | 2  | 2.8(14)      | 0.0009(6355)                |                 |                 |              |
|                   | Cr4          | Cr-Cr    | 2  | 2.8(23)      | 0.0005(2313)                |                 |                 |              |
|                   | Cr5          | Cr-Cr    | 4  | 2.9(4)       | 0.002(28)                   |                 |                 |              |
| 2.5 V after 3.6 V | Cr 1         | Cr-O     | 6  | 1.994(12)    | 0.0007(17)                  | -0.6(12)        | 2.65-12.15      | 2.98         |
|                   | Cr 2         | Cr-Cr    | 6  | 2.976(10)    | 0.0009(11)                  |                 |                 |              |

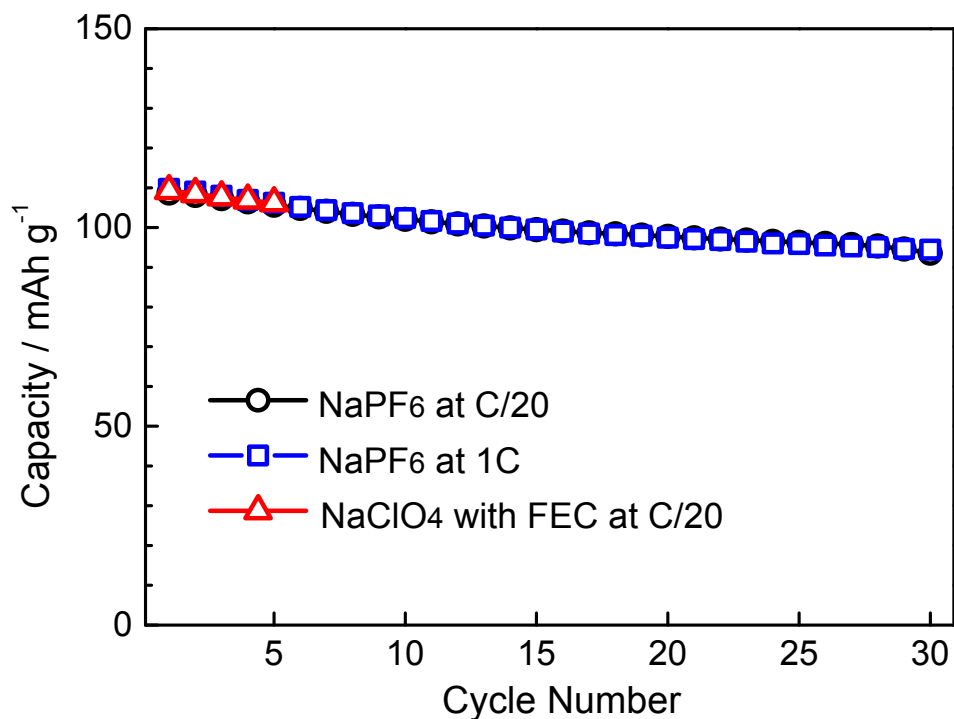

Fig. S1 Discharge capacity retention of Na//NaCrO<sub>2</sub> cells with 1.0 mol dm<sup>-3</sup> NaPF<sub>6</sub>/PC electrolyte solution at C/20 and 1C rate (1C = 250 mA g<sup>-1</sup>) and 1.0 mol dm<sup>-3</sup> NaClO<sub>4</sub>/PC with 2 vol % FEC in the voltage ranges of 2.5 – 3.5 V.

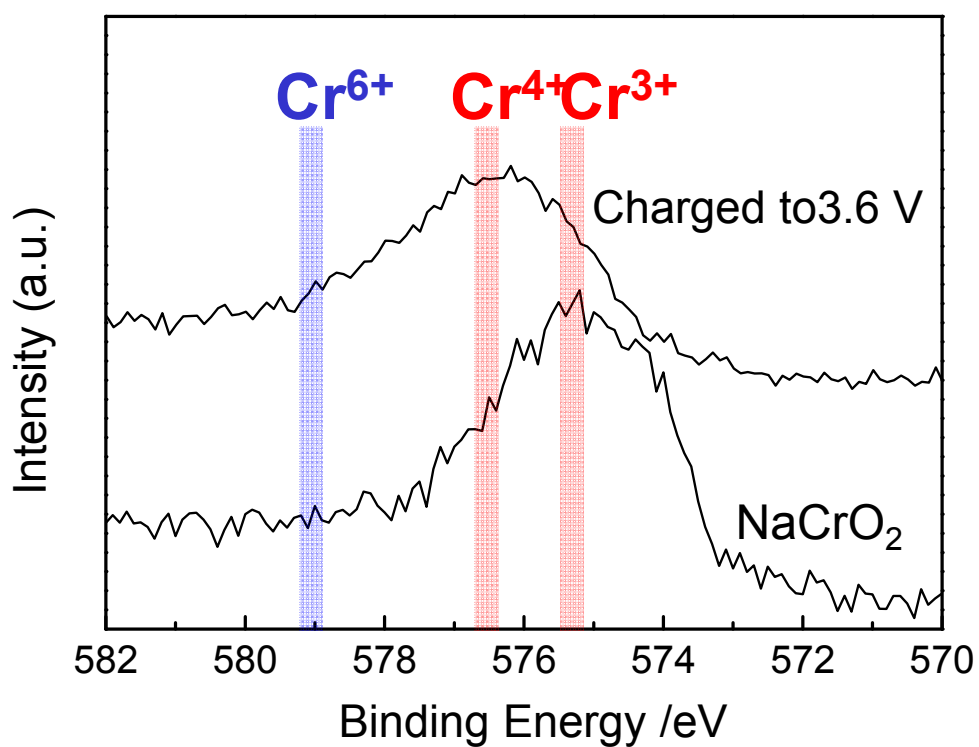

Fig. S2 Cr 2p<sub>3/2</sub> XPS spectra of NaCrO<sub>2</sub> electrodes before and after charge to 3.6 V. Energy shift of a peak at about 575 eV was observed, whereas a peak attributed to Cr<sup>6+</sup> at 579 eV was not seen.
